# Supplementary material for: Tumor-infiltrating nerves functionally alter brain circuits and modulate behavior in a mouse model of head-and-neck cancer
Source: eLife. 2024 Sep 20;13:RP97916. doi: 10.7554/eLife.97916 (PMC11415076; doi:10.7554/eLife.97916)
Supplement: Supplementary file 2. [file elife-97916-supp2.xlsx]

## Sheet: Sheet1
Nesting scores	Main effect of time	strain by time interaction	Geisser-Greenhouse's epsilon
	(F(2.197, 52.74)= 15.97, p<0.0001)	(F(5, 120)= 3.193, p= 0.0097)	0.4395
Cookie test	Main effect of time	strain by time interaction	Geisser-Greenhouse's epsilon
	(F(4.021, 132.7)=19.61, p<0.0001)	(F(5, 165 0= 3.130, p= 0.0100	0.8043
	Main effect of strain
	(F(1, 33)= 10.46, p= 0.0028)
% change in weight	Main effect of time		Geisser-Greenhouse's epsilon
	(F(1.654, 56.22)+ 21.82, p<0.0001		0.4134
% change food disappearance	Main effect of time	strain by time interaction	Geisser-Greenhouse's epsilon
	(F(2.940, 99.94)+70.81, p<0.0001)	(F(4, 136)=15.57, p<0.0001)	0.7349
Tumor growth curves	Main effect of time	strain by time interaction	Geisser-Greenhouse's epsilon
	(F(1.500, 5105)=290.1, p<0.0001	(F(4, 136)=13.05, p<0.0001	0.3751
