# Supplementary material for: Tumor-infiltrating nerves functionally alter brain circuits and modulate behavior in a mouse model of head-and-neck cancer
Source: eLife. 2024 Sep 20;13:RP97916. doi: 10.7554/eLife.97916 (PMC11415076; doi:10.7554/eLife.97916)
Supplement: Supplementary file 3. [file elife-97916-supp3.xlsx]

## Sheet: Sheet1
Voluntary wheel running	main effect of time	time by drug interaction	Geisser-Greenhouse's epsilon
carprofen vs vehicle	(F(5.121, 92.17)+ 29.29, p<0.0001)	(F(20, 360)=5.398)	0.256
buprenorphine vs vehicle	(F(5.892, 106.1)=16.22, p<0.0001	(F(20, 360)=8.104	0.2946
Nesting scores	main effect of time	time by drug interaction	Geisser-Greenhouse's epsilon
carprofen vs vehicle	(F(1.965, 33.41)+18.39), p<0.0001)	(F(5, 85)= 16.13)	0.3931
buprenorphine vs vehicle	(F(2.091, 35.54)= 17.39, p< 0.0001)	(F(5, 85)= 17.60)	0.4181
% change in weight	main effect of time	time by drug interaction	Geisser-Greenhouse's epsilon
carprofen vs vehicle	(F(1.414, 24.04)=16.63, p=0.0001)	(F(7, 119)=16.18, p< 0.0001)	0.202
buprenorphine vs vehicle	(F(1.433, 24.37)= 11.70, p=0.0008)	(F(7, 119)=26.12, p<0.0001)	0.2048
carprofen vs buprenorphine		(F(7, 126)=24.91, p<.0.0001)
% change food disppearance	main effect of time	time by drug interaction	Geisser-Greenhouse's epsilon
carprofen vs vehicle	(F(2.052, 34.88)=30.79, p<0.0001)	(F(3, 51)=9.660)	0.6839
buprenorphine vs vehicle	(F(2.636, 44.80)=19.61, p<0.0001)	(F(3, 51)=33.43), p<0.0001)	0.8785
carprofen vs buprenorphine		(F(3, 54)= 5.094, p=0.0035
Tumor growth curves		time by drug interaction
carprofen vs buprenorphine		(F(4, 72)= 4.835, p=0.0016)
