# Supplementary figures and images for: Tumor-infiltrating nerves functionally alter brain circuits and modulate behavior in a mouse model of head-and-neck cancer
Source: eLife journal article supplement (doi:10.7554/elife.97916), 2024-06-03

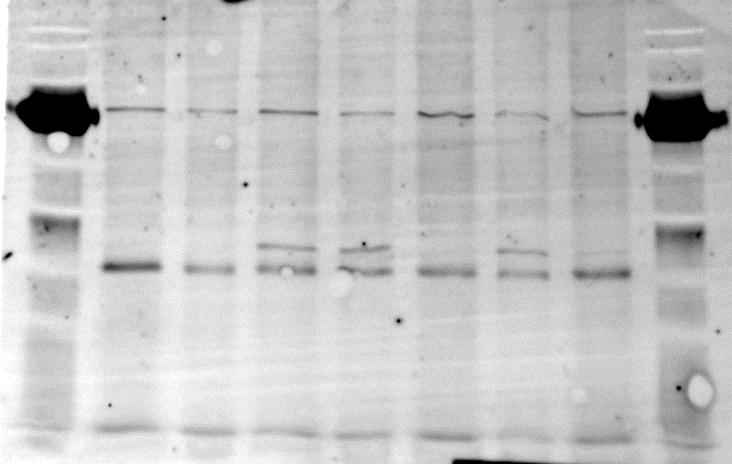

Supplement: fig2-data1 [file elife-97916-fig2-data1-v1.zip]

pTRPV1


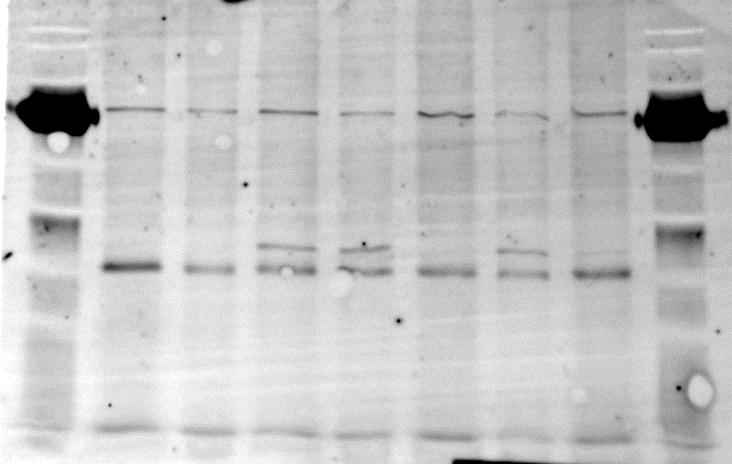


170kD

130kD

95kD

34kD

26kD

72kD

55kD

43kD

N

N

N

T

T

T

T

B.

Supplement: fig2-data2 [file elife-97916-fig2-data2-v1.zip]

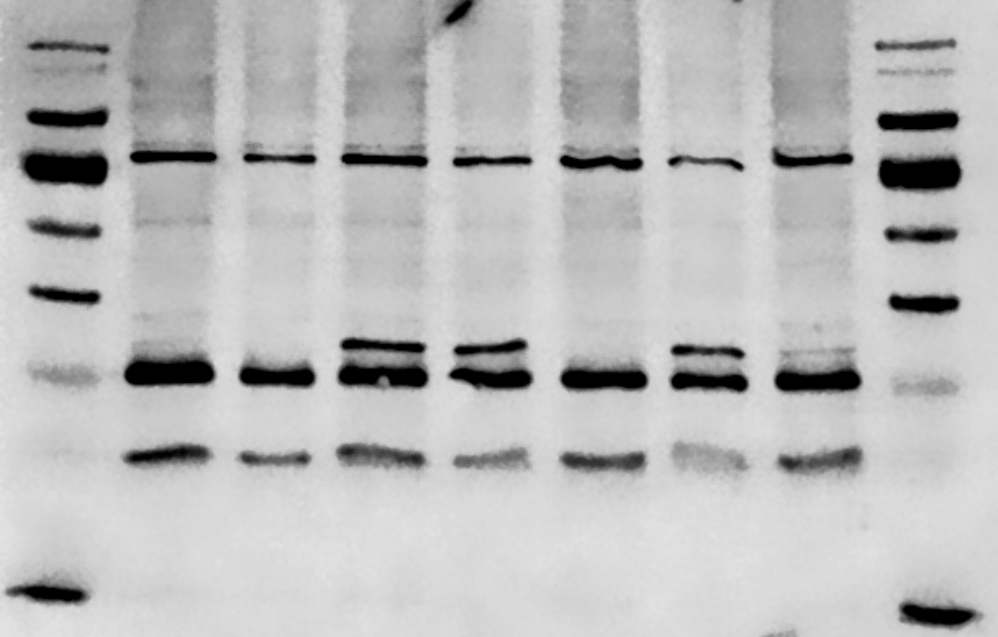

Supplement: fig2-data3 [file elife-97916-fig2-data3-v1.zip]

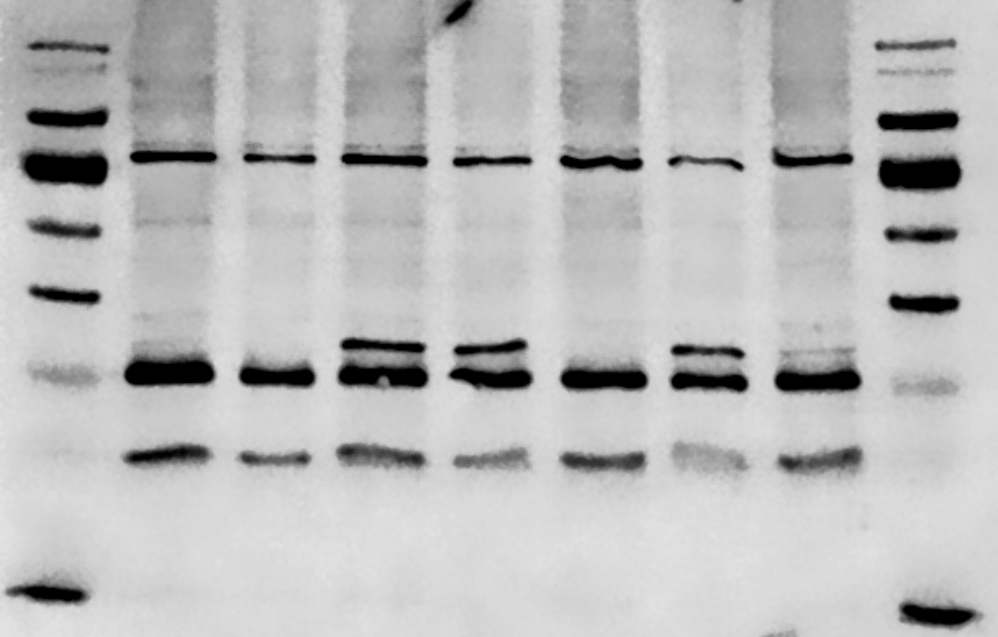


170kD

130kD

95kD

34kD

26kD

72kD

55kD

43kD

Sigma1-R

N

N

N

T

T

T

T

Supplement: fig2-data4 [file elife-97916-fig2-data4-v1.zip]

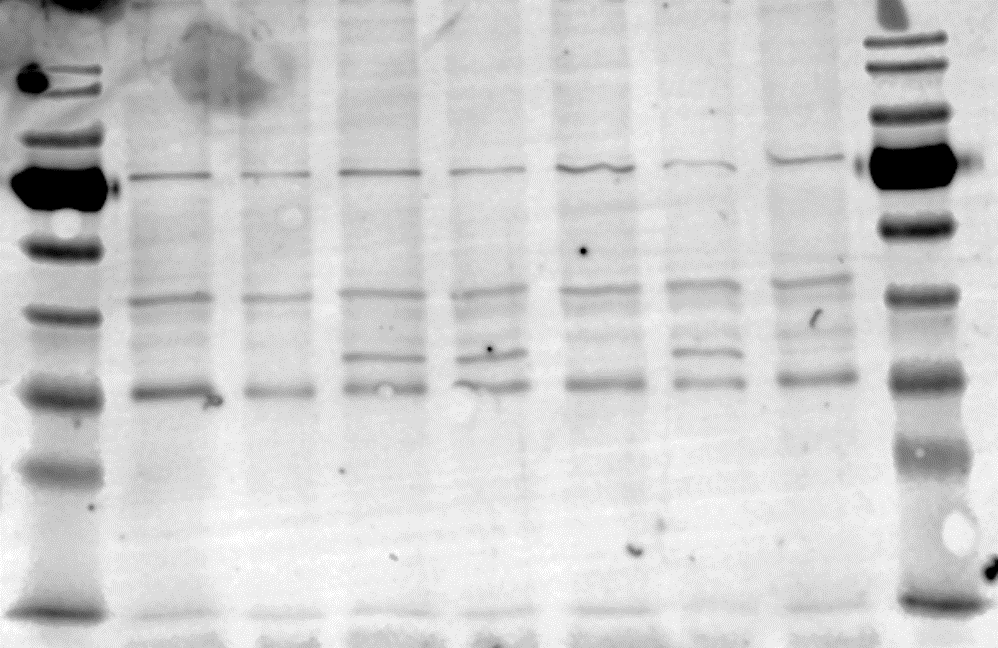

Supplement: fig2-data5 [file elife-97916-fig2-data5-v1.zip]

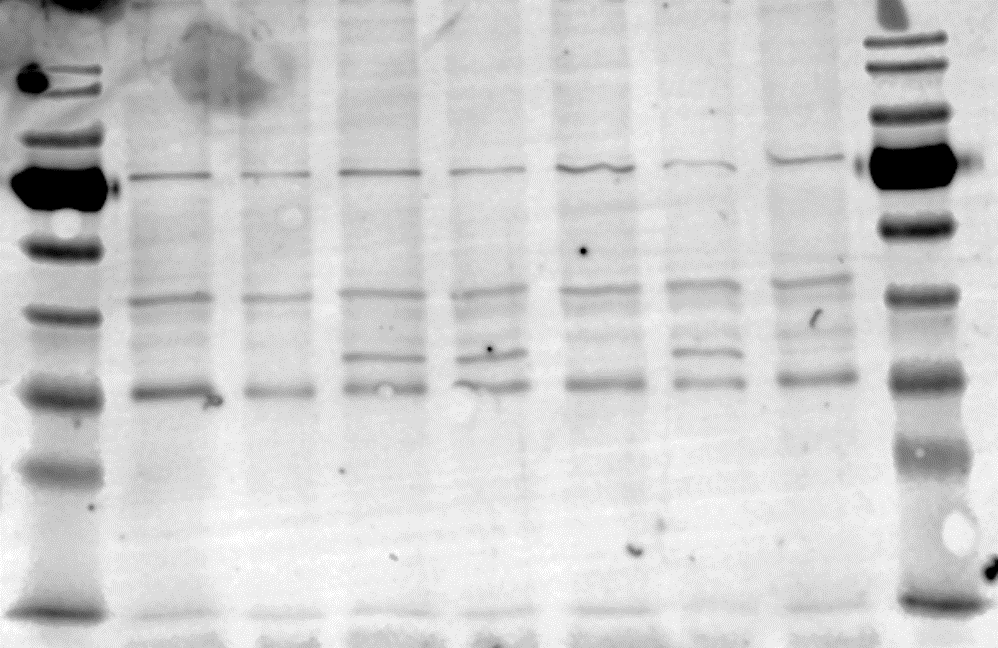


b-actin

170kD

130kD

95kD

34kD

26kD

72kD

55kD

43kD

N

N

N

T

T

T

T

Supplement: fig2-data6 [file elife-97916-fig2-data6-v1.zip]
